# Supplementary material
Source: Springer Nature journal article supplement (https://www.springermedizin.de/resource/supplementary/12955_2012_1025_MOESM5_ESM.pdf/9558674)

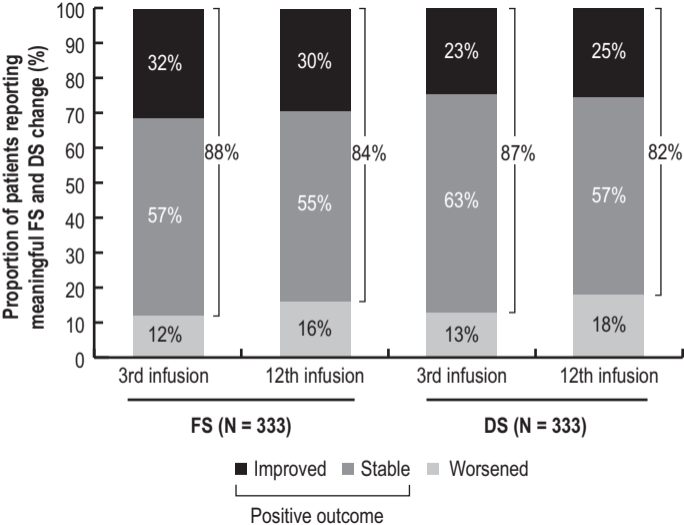

Supplement: MOESM5 [file 9558674]
